# Supplementary material for: A Novel Synthetic Precursor of Styryl Sulfone Neuroprotective Agents Inhibits Neuroinflammatory Responses and Oxidative Stress Damage through the P38 Signaling Pathway in the Cell and Animal Model of Parkinson’s Disease
Source: MDPI journal article supplement (doi:10.3390/molecules26175371), 2021-09-03
Supplement: s1 [file s1]

# Supplementary Material Table.

**Table S1.** The structure and chemical name of styryl sulfone compounds

| Compound | Structure diagram | Chemical names                                                                              |
|----------|-------------------|---------------------------------------------------------------------------------------------|
| CAPE     |                   | 3,4-Dihydroxy-trans-cinnamic acid phenethyl ester                                           |
| 3a       |                   | (E)-4-[2-((2-phenylethyl)sulfonyl)vinyl]benzene-1,2-diol                                    |
| 3b       |                   | (E)-4-[2-((4-(trifluoromethyl)benzyl)sulfonyl)vinyl]benzene-1,2-diol                        |
| 3c       |                   | (E)-4-[2-((3-phenylpropyl)sulfonyl)vinyl]benzene-1,2-diol                                   |
| 3d       |                   | (E)-4-[2-((4-chlorobenzyl)sulfonyl)vinyl]benzene-1,2-diol                                   |
| 3g       |                   | (E)-4-[2-((4-(tertbutyl)benzyl)sulfonyl)vinyl]benzene-1,2-diol                              |
| 4a       |                   | (E)-acetic acid 2-acetoxy-4-[2-(2-phenylethanesulfonyl)vinyl]phenyl ester                   |
| 4b       |                   | (E)-acetic acid 2-acetoxy-4-[2-(4-(trifluoromethyl)phenylmethanesulfonyl)vinyl]phenyl ester |
| 4c       |                   | (E)-acetic acid 2-acetoxy-4-[2-(3-phenylpropanesulfonyl)vinyl]phenyl ester                  |
| 4d       |                   | (E)-acetic acid 2-acetoxy-4-[2-(4-chlorophenylmethanesulfonyl)vinyl]phenyl ester            |
| 4g       |                   | (E)-acetic acid 2-acetoxy-4-[2-(4-(tertbutyl)phenylmethanesulfonyl)vinyl]phenyl ester       |

**Table S2.** The antibody information

| Antibody name                                         | Dilution ratio. | Reagent manufacture                        | Cat. no.  |
|-------------------------------------------------------|-----------------|--------------------------------------------|-----------|
| Tyrosine hydroxylase (TH) chicken polyclonal antibody | 1:500           | Abcam, San Francisco, CA, USA              | ab76442   |
| Dylight 488 labeled goat anti-chicken IgY             | 1:500           | Thermo Fisher Scientific, Waltham, MA, USA | SA5-10070 |
| Dylight 550 labeled goat anti-                        | 1:500           | Thermo Fisher Scientific,                  | SA5-      |

|                                                 |        |                                                         |           |
|-------------------------------------------------|--------|---------------------------------------------------------|-----------|
| mouse IgG                                       |        | Waltham, MA, USA                                        | 10173     |
| Dylight 650 labeled donkey anti-rabbit IgG      | 1:500  | Thermo Fisher Scientific, Waltham, MA, USA              | SA5-10041 |
| CD11b rabbit monoclonal antibody                | 1:1000 | Abcam, Cambridge, MA, USA                               | ab133357  |
| GFAP goat polyclonal antibody                   | 1:1000 | Abcam, Cambridge, MA, USA                               | ab53554   |
| p38 rabbit monoclonal antibody                  | 1:1000 | Abcam, Cambridge, MA, USA                               | ab170099  |
| p-p38 MAPK mouse monoclonal antibody            | 1:200  | Santa Cruz Biotechnology, Dallas, USA                   | sc-166182 |
| iNOS rabbit monoclonal antibody                 | 1:1000 | Abcam, Cambridge, MA, USA                               | ab178945  |
| COX-2 rabbit monoclonal antibody                | 1:1000 | Cell Signaling Technology, Inc., MA, USA                | 12282T    |
| Caspase-1 rabbit polyclonal antibody            | 1:1000 | Millipore, Burlington, MA, USA                          | AB1871    |
| NF- $\kappa$ B p65 mouse monoclonal antibody    | 1:1000 | Santa Cruz Biotechnology, Dallas, USA                   | sc8008    |
| HO-1 rabbit monoclonal antibody                 | 1:1000 | Abcam, Cambridge, MA, USA                               | ab68477   |
| GCLC rabbit monoclonal antibody                 | 1:1000 | Abcam, Cambridge, MA, USA                               | ab190685  |
| Nrf2 rabbit polyclonal antibody                 | 1:1000 | Abcam, Cambridge, MA, USA                               | ab137550  |
| Monoclonal antibody to GAPDH mouse              | 1:1000 | R&D Systems, Minneapolis, MN, USA                       | MAB5718   |
| Histone H1 mouse monoclonal antibody            | 1:1000 | Santa Cruz Biotechnology, Dallas, USA                   | sc-8030   |
| Horseradish enzyme labeled goat anti-mouse IgG  | 1:1000 | Beijing Zhongshan Jinqiao Biotechnology, Beijing, China | ZB-5305   |
| Horseradish enzyme labeled goat anti-rabbit IgG | 1:5000 | Beijing Zhongshan Jinqiao Biotechnology, Beijing, China | ZB-2301   |
| Horseradish enzyme labeled rabbit anti-goat IgG | 1:5000 | Beijing Zhongshan Jinqiao Biotechnology, Beijing, China | ZB-2306   |
